1  
2  
3  
4  
5  
6  
7  
8  
9  
10  
11  
12  
13  
14  
15  
16  
17  
18  
19  
20  
21

**Prohibitin is a prognostic marker of relapse and therapeutic target to block chemotherapy resistance in Wilms tumor**

Michael V. Ortiz<sup>1</sup>, Saima Ahmed<sup>2</sup>, Melissa Burns<sup>3</sup>, Anton G. Henssen<sup>1</sup>, Travis J. Hollmann<sup>4</sup>, Ian MacArthur<sup>1</sup>, Shehana Gunasekera<sup>1</sup>, Lyvia Gaewsky<sup>5</sup>, Gary Bradwin<sup>5</sup>, Jeremy Ryan<sup>3</sup>, Anthony Letai<sup>3</sup>, Ying He<sup>6</sup>, Arlene Naranjo<sup>6</sup>, Yueh-Yun Chi<sup>6</sup>, Michael LaQuaglia<sup>1,7</sup>, Todd Heaton<sup>1,7</sup>, Paolo Cifani<sup>8</sup>, Jeffrey S. Dome<sup>9</sup>, Samantha Gadd<sup>10</sup>, Elizabeth Perlman<sup>10</sup>, Elizabeth Mullen<sup>3,\*</sup>, Hanno Steen<sup>2,\*</sup>, Alex Kentsis<sup>1,8,12,\*</sup>

1: Department of Pediatrics, Memorial Sloan Kettering Cancer Center, New York, NY, United States

2: Department of Pathology, Boston Children’s Hospital, Boston, MA, United States

3: Dana-Farber Cancer Institute, Boston, MA, United States

4: Department of Pathology, Memorial Sloan Kettering Cancer Center, New York, NY, United States

5: Department of Laboratory Medicine, Boston Children’s Hospital, Boston, MA, United States

6: Children's Oncology Group Statistics and Data Center, Department of Biostatistics, University of Florida, Gainesville, FL, United States

7: Department of Surgery, Memorial Sloan Kettering Cancer Center, New York, NY, United States

8: Molecular Pharmacology Program, Sloan Kettering Institute, Memorial Sloan Kettering Cancer Center, New York, NY, United States

9: Center for Cancer and Blood Disorders, Children’s National Health System, Washington, DC, United States

22 10: Department of Pathology, Ann & Robert H. Lurie Children's Hospital of Chicago, Chicago, IL, United  
23 States

24 11: Department of Pathology, Boston Children's Hospital, Boston, MA, United States

25 12: Departments of Pediatrics, Pharmacology, and Physiology & Biophysics, Weill Cornell  
26 Medical College, Cornell University, New York, NY

27

28 \* Address correspondence to: Alex Kentsis ([kentsisresearchgroup@gmail.com](mailto:kentsisresearchgroup@gmail.com)), Hanno Steen  
29 ([hanno.steen@childrens.harvard.edu](mailto:hanno.steen@childrens.harvard.edu)), and Elizabeth Mullen ([elizabeth\\_mullen@dfci.harvard.edu](mailto:elizabeth_mullen@dfci.harvard.edu)).

30

31 Conflict of interest: AK is a consultant for Novartis. The other authors have declared that no conflict of  
32 interest exists.

33

34 **Abstract**

35

36 Wilms tumor (WT) is the most common childhood kidney cancer. To improve risk stratification  
37 and identify novel therapeutic targets for patients with WT, we used high-resolution mass spectrometry  
38 proteomics to identify urine tumor markers associated with WT relapse. We determined urine proteomes  
39 at diagnosis of 49 patients with WT, non-WT renal tumors, and age-matched controls, leading to the  
40 quantitation of 6,520 urine proteins. Supervised analysis revealed specific urine markers of renal rhabdoid  
41 tumors, kidney clear cell sarcomas, renal cell carcinomas, as well as those detected in cured and relapsed  
42 WT. In particular, urine prohibitin was significantly elevated at diagnosis in patients with relapsed as  
43 compared to cured WT. In a validation cohort of 139 patients, a specific urine prohibitin enzyme-linked  
44 immunosorbent assay demonstrated that prohibitin concentrations greater than 998 ng/mL at diagnosis  
45 were significantly associated with ultimate WT relapse. Immunohistochemical analysis revealed that  
46 prohibitin was highly expressed in primary WT specimens and associated with disease stage. Using  
47 functional genetic experiments, we found that prohibitin was required for the growth and survival of WT  
48 cells. Overexpression of prohibitin was sufficient to block intrinsic mitochondrial apoptosis and to cause  
49 resistance to diverse chemotherapy drugs, at least in part by dysregulating factors that control apoptotic  
50 cytochrome c release from mitochondrial cristae. Thus, urine prohibitin may improve therapy  
51 stratification, non-invasive monitoring of treatment response and early disease detection. In addition,  
52 therapeutic targeting of chemotherapy resistance induced by prohibitin dysregulation may offer  
53 improved therapies for patients with Wilms and other relapsed or refractory tumors.

54

55 **Introduction**

56 Wilms tumor (WT) is the most common kidney tumor in children. With current stratification and  
57 a combination of surgery, chemotherapy and radiotherapy, more than 90% of patients with low risk  
58 disease can now be cured. <sup>1</sup> However, treatment of patients with advanced, anaplastic, or relapsed  
59 disease remains challenging, with inadequate curative therapies and substantial long-term effects. <sup>1,2</sup>

60 While anaplastic histology WT, most frequently due to inactivating mutations of *TP53*, is  
61 associated with unacceptably poor survival, distinct subsets of patients with favorable histology WT also  
62 suffer disease relapse. <sup>1,3,4</sup> Loss of heterozygosity (LOH) at 1p and 16q was found to be associated with  
63 inferior prognosis of favorable histology WT. <sup>4,5</sup> This led to new clinical trials to investigate whether  
64 intensification of therapy for patients with tumor LOH of 1p and 16q could be used to improve survival.  
65 However, additional biomarkers of adverse prognosis, therapy resistance and disease relapse will be  
66 needed for improved stratification of existing therapies and development of new therapies that are  
67 precise, curative, and safe. For renal tumors in particular, urine biomarkers offer the ability to monitor  
68 disease and therapy response non-invasively.

69 Neuron-specific enolase, basic fibroblast growth factor (bFGF), and hyaluronidase have been  
70 reported to be enriched in the urine of patients with WT. <sup>6-9</sup> In particular, elevation of urinary bFGF was  
71 correlated with WT disease stage. <sup>7</sup> Though its specificity and sensitivity were not sufficient to permit  
72 clinical use, continued elevation of urinary bFGF in a subset of WT patients who developed persistent or  
73 relapsed disease suggests that urine profiling may reveal prognostic biomarkers and improved therapeutic  
74 targets for WT and other kidney tumors.

75 We and others used high-resolution mass spectrometry proteomics to profile urine in order to  
76 identify improved disease biomarkers. <sup>10-13</sup> Here, we profiled urine proteomes of patients with diverse  
77 childhood kidney tumors as compared to age-matched controls. By comparing initial urine proteomes of

78 patients who relapsed to those who were cured, we identified elevated urinary prohibitin (PHB) at  
79 diagnosis as a prognostic biomarker of relapse in favorable histology WT. Urinary PHB elevation was  
80 significantly associated with WT relapse in an independent patient cohort, with tumor PHB overexpression  
81 associated with WT disease stage. Using a battery of functional studies, we found that PHB  
82 overexpression regulates mitochondrial apoptosis and induces resistance to diverse chemotherapy drugs.  
83 These findings should enable improved WT therapy stratification and future strategies to overcome  
84 chemotherapy resistance to increase the cure rates of patients.

85

86 **Results**

87 ***Comparative urine proteomics of Wilms tumor, kidney rhabdoid tumor, kidney clear cell sarcoma, and***  
88 ***renal cell carcinoma reveals new biomarkers.***

89 In previous studies, we optimized methods for the analysis of clinical urine proteomes, including  
90 protein isolation, fractionation, and high-resolution mass spectrometry.<sup>10-13</sup> For this study of childhood  
91 kidney tumors, we assembled a cohort of specimens collected at diagnosis from 49 patients, including 16  
92 with favorable histology WT, 6 with rhabdoid tumor of the kidney (RTK), 9 with clear cell sarcoma of the  
93 kidney (CCSK), and 2 with renal cell carcinoma (RCC). For comparison, we included 16 age-matched  
94 control specimens collected from 10 healthy children and 6 children with acute abdominal pain who were  
95 evaluated as part of our prior study of acute appendicitis, and whose symptoms resolved spontaneously.  
96 <sup>11</sup> Mass spectrometric proteomic analysis of all specimens led to the identification of 6,520 urine proteins,  
97 detected with at least 2 unique peptides at the false discovery rate threshold of 1% (Figure 1A). As  
98 expected, supervised analysis of all kidney tumor specimens versus the age-matched controls revealed  
99 that urine tumor proteomes are dominated by markers of tissue injury and hematuria, consistent with  
100 kidney and blood vessel invasion (Supplemental Figure 1A).

101 Importantly, supervised analysis of distinct tumor specimens revealed new tumor markers, such  
102 as PGBD5 (Supplemental Figure 1B), which we recently validated as an oncogenic DNA transposase and  
103 therapeutic target in rhabdoid tumors.<sup>14-17</sup> In the case of favorable histology WT, we identified the most  
104 abundant proteins specifically detected in WT as compared to other non-WT kidney tumor urine  
105 specimens (Supplemental Figures 1B-E). Finally, we stratified WT patients based on clinical outcome and  
106 identified urine proteins detected specifically in cases of relapsed favorable histology WT as compared to  
107 favorable histology WT (Figure 1B). These included  $\beta$ -catenin antagonist DACT2, mitochondrial regulators  
108 DAD1 and PHB, among others. Thus, comparative urine proteomics can be used to identify urine

109 biomarkers, including new tumor markers that may represent improved biomarkers and therapeutic  
110 targets.

111 ***Urine prohibitin is a prognostic marker of Wilms tumor relapse.***

112 To validate their prognostic significance and identify improved therapeutic targets of relapsed  
113 WT, we assembled an independent cohort of 139 specimens, including 99 favorable histology WT  
114 specimens, and 40 age-matched controls ([Supplemental Table 1](#)). First, we used enzyme-linked  
115 immunosorbent assay (ELISA) to measure protein concentration of candidate WT markers in clinical urine  
116 specimens. We used commercially available antibodies measure the top 3 urine markers enriched in  
117 patients with relapsed WT. While we could not develop specific ELISAs for DACT2 and DAD1 due to the  
118 limitations of commercially available antibodies, we confirmed that ELISA for PHB provided accurate  
119 measurements of urine PHB, with a linear signal response in the ng/mL range, as determined using  
120 purified recombinant PHB ([Figure 2A](#)). Thus, we measured the urine concentration of PHB, as compared  
121 to urine creatinine as a control for overall urine concentration ([Supplemental Figure 2](#)). We found that  
122 urine PHB was significantly enriched in diagnostic urine specimens from patients who ultimately relapsed  
123 (median 1672 ng/mL), as compared to those from patients who were ultimately cured (median 131  
124 ng/mL) or age-matched controls (median 218 ng/mL). Using logistic regression, we determined that the  
125 PHB urine concentration of 998 ng/mL was significantly associated with WT relapse (odds ratio = 153.3,  
126 [Figure 2B](#)). Both urine PHB concentration and urine PHB concentration normalized to urine creatinine (Cr)  
127 were statistically significant predictors of relapse, independent of stage and therapy ([Figure 2](#),  
128 [Supplemental Figure 2](#)). Similarly, receiver operating characteristic (ROC) curve analysis showed that  
129 urine PHB in patients with WT relapse had the prognostic area under the curve (AUC) of 0.78 (95%  
130 confidence interval 0.68-1.0; [Figure 2C](#)). Almost all patients with elevated urine PHB at diagnosis  
131 developed WT relapse within 2 years after therapy ([Figure 2D](#)). We confirmed that urine PHB elevation

132 was not due to urine concentration, as evident by the lack of statistically significant differences in urine  
133 creatinine concentration ([Supplemental Figure 2A-C](#)). We found that urine PHB was significantly elevated  
134 in patients with abdominal as compared to lung WT relapse ([Figure 2E](#)). Indeed, urine PHB exhibited a  
135 near perfect prognostic performance for abdominal WT relapse, with the ROC AUC of 0.96 (95%  
136 confidence interval 0.91-1.0; [Figure 2F](#)). In all, these results indicate that urine PHB is a significant  
137 prognostic marker of WT relapse.

### 138 ***Prohibitin is overexpressed in Wilms tumor cells and correlates with tumor stage.***

139 To determine whether elevated PHB in WT patient urine samples was due to increased expression  
140 of PHB in WT cells, we used immunohistochemistry (IHC) using formalin-fixed paraffin embedded primary  
141 patient WT specimens, as compared to adjacent normal kidney tissue. We found that PHB was highly  
142 expressed in both favorable histology WT ([Figure 3B and 3E](#)), as well as diffusely anaplastic WT ([Figure 3C](#)  
143 [and 3F](#)). In agreement with prior studies, we also observed PHB expression in normal kidney tubules  
144 ([Figure 3A and 3D](#)).<sup>18</sup> We assembled a cohort of 59 primary favorable histology WT specimens and 10  
145 control non-WT benign and malignant renal samples, uniformly stained for PHB ([Supplemental Table 2](#)).  
146 We scored IHC PHB expression in a blinded manner on the 0 to 3+ scale. Representative images of score  
147 levels are shown in [Supplemental Figure 3](#). Notably, all Wilms tumors expressed PHB from 1+ to 3+  
148 ([Supplemental Figures 3D-F](#)). Consistent with the specific detection of PHB in WT but not other kidney  
149 tumors ([Figure 1B](#)), we found no detectable PHB expression in pre-malignant nephrogenic rests  
150 ([Supplemental Figure 3A](#)), embryonal rhabdomyosarcoma ([Supplemental Figure 3B](#)), and clear cell  
151 sarcoma of the kidney ([Supplemental Figure 3C](#)). We found that PHB expression in WT correlated with  
152 higher tumor stage and increased percentage of tumors with higher PHB expression ([Figure 3G](#)).

153 We further validated PHB expression using quantitative image densitometry in a second cohort  
154 of 38 primary WT patients, including both favorable histology and anaplastic WT ([Supplemental Table 4](#)).



155 We observed increased PHB expression in favorable histology WT cells of specimens that ultimately  
156 relapsed, as compared with those that were cured with surgery and chemotherapy (Figure 3H). On a per-  
157 cell-basis, PHB expression was increased in favorable histology WT as compared to anaplastic histology  
158 WT (Figure 3I). We did not observe a statistically significant correlation between *PHB* mRNA expression  
159 and *TP53* mutations in diffusely anaplastic WT samples (Supplemental Figure 4). Likewise, we did not find  
160 recurrent mutations or amplification of *PHB* in a recently analyzed cohort of 117 patient WT specimens.  
161 <sup>19</sup> Though we found that cellular PHB expression was similar between WT and some normal kidney cells  
162 (Supplemental Figure 5A), we found that WT cells were 12% smaller, with 27% smaller cytoplasm and 11%  
163 larger nuclei, as compared to normal kidney cells (Supplemental Figure 5B). These findings suggest that  
164 WT cells overexpress PHB in specific subcellular compartments, presumably through post-transcriptional  
165 mechanisms.

166 ***PHB is required for the growth and survival of Wilms tumor cells by regulating mitochondrial functions.***

167 Relative overexpression of PHB in WT cells suggests that PHB may contribute to their growth and  
168 survival. To assess this, we examined PHB expression and subcellular localization in WT cell lines WIT49,  
169 WTCLS1, and CCG9911, as compared to immortalized human BJ fibroblasts. Using quantitative  
170 fluorescent Western blot immunoassays, we found that PHB is more highly expressed in WT cell lines, as  
171 compared to BJ fibroblasts (Figure 4A). Normalized to cellular actin, PHB expression was an average 2.9,  
172 2.7, and 3.3-fold higher in the WIT49, WTCLS1, and CCG9911 cells, respectively, as compared to normal  
173 BJ fibroblasts (Figure 4B).

174 Relative overexpression of PHB in WT cells and their relatively smaller size as compared to normal  
175 cells suggest that tumor PHB overexpression may be due to its increased expression in specific subcellular  
176 compartments, such as mitochondria. <sup>20</sup> Compelled by the finding of PHB staining in the cytoplasm of  
177 WT cells (Figure 3), we used confocal immunofluorescence microscopy to define the subcellular

178 localization of PHB in WT cell lines. We observed that most of cellular PHB co-localized with the specific  
179 mitochondrial inner membrane marker CoxIV (Figure 4C). These findings are consistent with prior studies  
180 that identified PHB heterodimerization with PHB2 in association with the inner mitochondrial membrane  
181 to regulate mitochondrial morphogenesis.<sup>21-26</sup> Thus, we reasoned that PHB overexpression may  
182 contribute to the growth or survival of WT cells. To test this hypothesis, we used three independent short  
183 hairpin RNA (shRNA) interference lentiviral constructs to deplete PHB in WT cell lines, as compared to the  
184 control shRNA targeting the green fluorescent protein (GFP) which is not expressed (Figure 5 A, B, and C).  
185 We confirmed PHB depletion using Western immunoblotting (Figure 5 A, B, and C). Consistently, cells  
186 depleted of PHB exhibited significantly decreased proliferation, as compared to wild-type cells or those  
187 expressing the control GFP-targeting shRNA (Figure 5 D, E, and F).

188 PHB has been reported to regulate mitochondrial morphology by interacting with the OPA1  
189 GTPase, and the YME1L and OMA1 proteases that proteolytically process OPA1 that can control the  
190 release of cytochrome c from mitochondrial cristae during apoptosis.<sup>27 28,29</sup> We found that WT cells have  
191 elevated levels of OMA1 and variable levels of YME1L relative to BJ fibroblasts (Figure 6A). Consistent  
192 with the putative interaction of PHB with OPA1, depletion of PHB was associated with apparent reduction  
193 of OMA1 in all WT cell lines tested, but not in control cells transduced with GFP-targeting controls (Figure  
194 6B-D). Since YME1L can proteolytically cleave OPA1<sup>30,31</sup>, we analyzed apparent OPA1 isoforms by Western  
195 immunoblotting. We found that cells with elevated endogenous YME1L, such as WTCLS1, depletion of  
196 PHB was associated with a reduction of YME1L and the S4 isoform of OPA1 (Figure 6D). Conversely, in  
197 cells with relatively low endogenous YME1L, such as WiT49 and CCG9911, depletion of PHB increased  
198 YME1L and the S4 OPA1 isoform (Figures 6B and C). In all, these findings indicate that PHB directly or  
199 indirectly interacts with the mitochondrial intermembrane proteases OMA1 and YME1L that  
200 cooperatively process OPA1.

201

202 ***PHB overexpression causes resistance to mitochondrial apoptosis and diverse chemotherapy drugs.***

203 PHB-mediated control of OPA1 processing that can regulate apoptotic cytochrome c release raises  
204 the possibility that PHB overexpression in WT may impair mitochondrial apoptosis and cause  
205 chemotherapy resistance. To test this hypothesis, we ectopically overexpressed PHB in WT cell lines  
206 WTCLS1 and WiT49 as well as BJ fibroblasts using lentiviral transduction and confirmed transgene  
207 expression by Western immunoblotting of PHB and its V5 epitope tag in two independent clones ([Figure](#)  
208 [7](#)). Even though we found relatively modest overexpression of PHB as compared to its endogenous levels,  
209 all PHB-overexpressing cells exhibited significantly increased resistance to vincristine, doxorubicin and  
210 dactinomycin, as compared to wild-type cells or control cells transduced with empty vectors ([Figure 8](#)).  
211 This effect was more pronounced in BJ fibroblasts and WTCLS1 WT cells, as compared to WiT49 WT cells,  
212 consistent with the relatively higher levels of endogenous PHB in WiT49 cells ([Figure 4](#)).

213 Overexpression of PHB in patient Wilms tumors and urine, its requirement for enhanced WT cell  
214 growth, control of OPA1 and other factors that can regulate mitochondrial cytochrome c release, and  
215 sufficiency to cause resistance to chemotherapy drugs with diverse mechanisms of action suggest that  
216 PHB overexpression may contribute to WT therapy failure and relapse by blocking intrinsic mitochondrial  
217 apoptosis. To test this prediction, we used BH3 profiling, a dynamic assay of mitochondrial apoptotic  
218 function, of WiT49 WT and normal BJ cells ([Figure 9, Supplemental Figure 6](#)), as optimized to specifically  
219 measure mitochondrial cytochrome c release using flow cytometry.<sup>32</sup> Upon activation of mitochondrial  
220 apoptosis, we observed that PHB overexpression caused increased resistance to multiple different  
221 synthetic BH3 apoptotic activators, including PUMA, BAD, and BID ([Figure 9, Supplemental Figure 6](#)).

222 To further elucidate mitochondrial abnormalities in WT, we used transmission electron  
223 microscopy to determine the mitochondrial structure of newly diagnosed favorable histology WT

224 immediately following nephrectomy. We observed that WT cells exhibited smaller mitochondria with  
225 blunted cristae and reduced matrix density, as compared to normal kidney tissue ([Figure 10A-C](#)). This is  
226 consistent with abnormal mitochondrial fission in WT, in agreement with aberrant mitochondrial  
227 morphogenesis induced by PHB overexpression, and prior ultrastructural studies of WT.<sup>33</sup> Thus, PHB  
228 overexpression causes intrinsic mitochondrial apoptosis resistance, thereby promoting chemotherapy  
229 resistance and WT therapy failure.

230 **Discussion**

231 Pathogenesis of childhood solid tumors remains poorly understood. <sup>15</sup> In particular, distinct renal  
232 tumors remain difficult to treat, with limited knowledge of prognostic biomarkers and therapeutic targets.  
233 In the case of Wilms tumors, the most common childhood kidney tumor, subsets of patients remain  
234 incurable, with no effective means to monitor therapy response, stratify existing therapies, and identify  
235 improved therapeutic targets. In this context, our findings are significant for several reasons. First,  
236 reported urine proteome profiles of diverse kidney tumors provide a rich source of tumor biomarkers and  
237 therapeutic targets. Indeed, our recent study of PGBD5, identified in the proteomic profiles of renal  
238 rhabdoid tumors, revealed an unanticipated mechanism of solid tumor pathogenesis and improved  
239 therapeutic targets. <sup>15-17</sup>

240 In the case of Wilms tumors, we found that overexpression of PHB at diagnosis is a prognostic  
241 marker of WT relapse. Levels of urinary PHB above 998 ng/mL were found to be significantly associated  
242 with relapse in independent cohorts of WT patients ([Figures 1 and 2](#)). PHB overexpression was found to  
243 be elevated not only in urine but also in tumor tissue samples in both favorable and anaplastic histology  
244 WT, and primarily localized to the mitochondria ([Figures 3 and 4](#)). We found that PHB was required for  
245 the growth and survival of WT cells, at least in part by regulating mitochondrial function and apoptosis  
246 ([Figures 5 and 6](#)). Importantly, ectopic overexpression of PHB was sufficient to cause resistance to diverse  
247 chemotherapy agents used for clinical treatment of WT. PHB overexpression blocked cytochrome c  
248 release from mitochondria, an essential step in the initiation of intrinsic mitochondrial apoptosis ([Figures](#)  
249 [7-9](#)), at least in part by dysregulating mitochondrial cristae ([Figure 10](#)). Thus, we conclude that PHB  
250 overexpression impairs mitochondrial morphogenesis and apoptotic priming, and causes chemotherapy  
251 resistance, as schematized in [Figure 11](#), which can be monitored non-invasively by urine PHB  
252 measurements.

253 Overexpression of PHB has been described in other tumors, such as breast carcinomas, where  
254 somatic amplifications of the *PHB* gene have been reported in a subset of tumors.<sup>34-36</sup> We did not observe  
255 any cases of WT with *PHB* mutations or amplifications, suggesting that WT overexpression of PHB may  
256 involve post-transcriptional mechanisms. *PHB* expression has been found to be regulated by miR-27a in  
257 other tissues<sup>37-40</sup>, and miR-27a is significantly downregulated in chemotherapy resistant blastemal Wilms  
258 tumors.<sup>41</sup> Since several miRNA processing genes are recurrently mutated in subsets of Wilms tumors, it  
259 is possible that PHB overexpression is caused by miRNA dysregulation, potentially including miR-27a.  
260 Future studies will be needed to determine the mechanisms of potential regulation of *PHB* expression by  
261 miRNAs and causes of its pathogenic overexpression. Likewise, additional studies will be needed to  
262 determine the prevalence and function of PHB in highly chemotherapy resistant anaplastic WT.

263 We found urine PHB to be elevated in the majority of favorable histology WT patients whose  
264 disease ultimately relapsed (Figure 2B). These diagnostic urine PHB levels were generally orders of  
265 magnitude higher in patients with ultimately relapsed WT as compared to cured patients (Figure 2B).  
266 However, in primary tumor tissue samples, PHB was significantly but modestly overexpressed in relapsed  
267 WT as compared to cured WT and normal kidney tissue (Figure 3, Supplemental Figure 5). Thus, urine  
268 PHB elevation may be due to increased WT cell invasion and PHB release into renal tubules, as suggested  
269 by the increased invasiveness of colorectal and lung carcinomas with PHB overexpression.<sup>42-44</sup> This  
270 possibility is further supported by the relatively higher frequency of abdominal WT relapse in patients  
271 with elevated urine PHB (Figure 2E). Additional studies will be needed to establish the mechanisms and  
272 significance of this possible phenomenon, and its relationship with abnormal mitochondrial structure and  
273 function induced by PHB overexpression. However, if PHB overexpression indeed causes increased WT  
274 cell invasion, then augmenting local control measures such as additional lymph node dissection and  
275 radiation therapy may be helpful.

276 Our findings implicate the interaction between PHB and the mitochondrial proteases OMA1 and  
277 YMEL1 in the dysregulation of mitochondrial cristae function and apoptotic cytochrome c release. It is  
278 possible that the ring complex formed by PHB and PHB2 affects the OPA1 GTPase that remodels  
279 mitochondrial cristae by sequestering the inner mitochondrial membrane OMA1 and YMEL1 proteases  
280 within microdomains which are unable to access OPA1.<sup>21,45</sup> As a result, PHB overexpression would impair  
281 the release of cytochrome c from mitochondrial cristae, blocking the initiation of mitochondrial apoptosis,  
282 as well as altering the dynamics of mitochondrial morphogenesis, which could further contribute to  
283 alterations in apoptosis.<sup>28-31,46</sup> In addition, although the PHB complex is associated with the inner  
284 mitochondrial membrane, it has been shown to interact with BAX and BAK that comprise the apoptotic  
285 MOMP pore.<sup>20,47</sup> Thus, in addition to modulating cytochrome c release at crista junctions, PHB  
286 overexpression may also impair the formation or function of the MOMP pore. Third, PHB overexpression  
287 may impair apoptosis because the properties of the mitochondrial outer membrane govern the ability of  
288 the predominantly cytosolic BAX to insert into the mitochondrial outer membrane as well as its ability for  
289 subsequent activation by BH3-only proteins.<sup>48,49</sup> Notably, this impaired BAX membrane insertion would  
290 be expected in smaller, hyper-fragmented mitochondria produced as a result of mitochondrial fission.<sup>48</sup>  
291 Lastly, PHB overexpression can also affect the energetic and metabolic mitochondrial functions, as well as  
292 its other cellular functions, such as regulation of cytosolic signaling. For example, PHB has been reported  
293 to interact with the mitochondrial respiratory machinery and thus it is also possible that PHB mediated  
294 overexpression co-opts mitochondrial respiration.<sup>26</sup> An analogous mechanism was described wherein  
295 inhibitory factor 1 mediated a decrease in OMA1 proteolysis and resulted in impaired Opa1 cleavage by  
296 maintaining ATP levels thereby reducing glutathione consumption and inactivating peroxiredoxin 3 during  
297 apoptosis.<sup>50</sup> Importantly, given that rocaglamides and aurilide can interact with PHB, it is possible that  
298 their derivatives can be developed to specifically interfere with the oncogenic functions of PHB in WT and  
299 other tumors.<sup>51-54</sup>

300           In all, PHB-mediated evasion of apoptosis through dysregulation of mitochondrial cristae  
301 structure represents a previously unanticipated mechanism by which WT cells resist cell death, thereby  
302 causing therapy failure and WT relapse. Non-invasive monitoring of urine prohibitin offers an immediately  
303 accessible biomarker to identify and treat patients at risk for WT relapse, which should be investigated in  
304 future prospective clinical trials.

305

306



307 **Methods**

308 ***Specimens***

309 Urine and tumor specimens were obtained from the Children's Oncology Group and Memorial  
310 Sloan Kettering Cancer Center, as part of institutional review board-approved research studies, with  
311 informed subject consent.

312 ***Mass Spectrometry***

313 Urine specimens were fractionated and the protein composition of the fractions was identified by  
314 using high-resolution mass spectrometry as described previously<sup>13</sup>. Briefly, individual five ml urine  
315 aliquots were fractionated using ultracentrifugation, protein precipitation, and denaturing polyacrylamide  
316 gel electrophoresis, and protein fractions were reduced, alkylated and trypsin digested. Urine protein  
317 fractions were subjected to liquid chromatography tandem mass spectrometry using a nanoflow HPLC  
318 system (Eksigent, Dublin, CA) coupled to the hybrid linear ion trap-Fourier transform ion cyclotron  
319 resonance mass spectrometer (LTQ FT Ultra, Thermo Scientific, Waltham, MA). Resultant spectra were  
320 processed to extract the 200 most intense peaks and searched against the human International Protein  
321 Index database (version 3.69) by using MASCOT version 2.1.04 (Matrix Science). Assessment of  
322 identification accuracy was carried out by searching a decoy database composed of reversed protein  
323 sequences of the target IPI database. Only proteins identified on the basis of two or more unique peptides  
324 were included in the analysis, at a false discovery rate of <1% at the peptide level. Mass spectrometry  
325 data are openly available at PeptideAtlas (<http://www.peptideatlas.org/PASS/PASS00248>).

326 ***PHB ELISA***

327 Enzyme linked immunosorbent assay (ELISA) against human PHB was constructed using the  
328 sandwich capture method. The capture antibody was a rabbit polyclonal antibody against the C-terminal

329 domain and the detection antibody was a mouse monoclonal antibody paired with the capture antibody  
330 and labeled with biotin. The blocking buffer was composed of 1% bovine serum albumin in phosphate-  
331 buffered saline. Recombinant human prohibitin was produced in *E.coli* as a single, non-glycosylated His-  
332 tagged protein. Streptavidin-horseradish peroxidase with tetramethylbenzidine as a substrate was used  
333 for detection, as available from Novatein Biosciences (BG-HUM11702; Woburn, MA, United States).

### 334 ***Immunohistochemistry and Immunofluorescence***

335 Immunohistochemistry was performed using established methods as described previously.<sup>55</sup>  
336 Images were analyzed using the Halo imaging analysis software (Indica Labs; Corrales, NM, United States).  
337 24,862,509 cells in total were counted and scored from 0+ to 3+ based on PHB expression. Confocal  
338 immunofluorescence microscopy was performed using cells plated in 4-well glass Millicell EZ slides fixed  
339 in 4% paraformaldehyde and washed with PBS prior to imaging. PHB and CoxIV antibodies used are listed  
340 in the Western Blotting section below, and were stained at 2.5 and 1.2 µg/mL, respectively. Images were  
341 acquired using the Leica TCS SP5 II (Leica Microsystems Inc., Buffalo Grove, IL, United States).

### 342 ***Cell culture***

343 HEK293T and BJ cells were obtained from the American Type Culture Collection (Manassas, VA,  
344 United States). WTCLS1 cells were obtained from the Leibniz Institute - Deutsche Sammlung von  
345 Mikroorganismen und Zellkulturen (Braunschweig, Germany). CCG-9911 cells were a gift from Benjamin  
346 Tycko at Columbia University (New York, New York, United States). WiT49 cells were a gift from Herman  
347 Yeger at University of Toronto (Toronto, Ontario, Canada). The identity of all cell lines was verified by STR  
348 analysis and lack of Mycoplasma contamination was confirmed by Genetica DNA Laboratories (Burlington,  
349 NC, United States). BJ cells were cultured in DMEM; WTCLS1 and CCG-9911 cells were cultured in IMDM;  
350 and WiT49 cells were cultured in DMEM F-12. All media included 10% fetal bovine serum, 100 U/mL

351 penicillin, 100 µg/mL streptomycin, and 1% glutamine, as maintained in a humidified atmosphere at 37°C  
352 and 5% CO<sub>2</sub>.

### 353 ***Plasmids***

354 For RNA interference, pLKO.1 vectors targeting PHB were obtained from the RNAi Consortium:  
355 TRCN0000029204 (referred to as shPHB4), TRCN0000029206 (referred to as shPHB6), and  
356 TRCN0000029208 (referred to as shPHB8). PHB was overexpressed using pLX304 vector, as obtained from  
357 the DNASU repository. All plasmids were verified by restriction endonuclease mapping and Sanger  
358 sequencing, and are available from Addgene ([https://www.addgene.org/Alex\\_Kentsis/](https://www.addgene.org/Alex_Kentsis/)).

### 359 ***Lentivirus Transduction***

360 Lentivirus particles were produced using HEK293T cells with the psPAX2 and pMD2.G packaging  
361 plasmids, as described previously.<sup>16</sup> Cell transduction was performed using the multiplicity of infection of  
362 10 in the presence of 8 µg/ml hexadimethrine bromide. Transduced cells were selected using puromycin  
363 (3 µg/mL) for the pLKO.1 vectors or with blasticidin (3 µg/mL) for the pLX304 vectors. Transduced cells  
364 were cloned using limiting dilution.

### 365 ***Western Blotting***

366 Western blotting was carried out as described.<sup>14</sup> PHB antibody used was a rabbit polyclonal  
367 antibody (1:1000, H-80) from Santa Cruz Biotechnology (Dallas, TX, United States). OMA1 antibody used  
368 was a mouse monoclonal antibody (1:1000, H-11) from Santa Cruz Biotechnology (Dallas, TX, United  
369 States). YME1L antibody used was a rabbit polyclonal antibody (1:1000, AP4882a) from Abgent (Suzhou  
370 city, Jiangsu Province, China). Opa1 antibody used was a mouse monoclonal antibody (1:1000, 18/Opa-1)  
371 from BD Biosciences (Franklin Lakes, NJ, United States). For loading controls, β-actin mouse monoclonal  
372 antibody (1:5000, 8H10D10) from Cell Signaling Technology (Beverly, MA, United States), β-tubulin rabbit

373 polyclonal antibody (1:2500, T2200) from Millipore Sigma (St.Louis, MO, United States), and Cox IV rabbit  
374 polyclonal antibody (1:1000, 4844) from Cell Signaling Technology (Beverly, MA, United States) were used.  
375 The secondary antibodies used in this study include IRDye 680RD goat anti-rabbit and IRDye 800CW goat  
376 anti-mouse secondary antibodies, both at 1:15,000 dilution and obtained from Li-cor (Lincoln, NE, United  
377 States). Imaging and quantification was performed using the Li-Cor Odyssey Imaging System (Lincoln, NE,  
378 United States).

### 379 ***Electron Microscopy***

380 Fresh 1 cm<sup>3</sup> pieces of tissue were fixed in 2.5% glutaraldehyde, 4% paraformaldehyde, 0.02%  
381 picric acid in 0.1 M sodium cacodylate buffer overnight at 4°C, washed, and then post fixed with osmium  
382 tetroxide reduced with potassium ferricyanide for 1 hour at room temperature, washed, and  
383 dehydrated in graded ethanol. Blocks generated using Embed 812 (Electron Microscopy Sciences,  
384 Hatfield, PA) resin were cut at 65 nm and mounted on copper grids, stained with uranyl acetate and lead  
385 citrate, and imaged using the JEM-1400 electron microscope (JEOL, Tokyo, Japan) as described  
386 previously.<sup>56</sup>

### 387 ***Statistics***

388 Exploratory simple logistic regression models were fit to determine the optimal cut-off point for  
389 urine PHB and normalized PHB, which was the ratio of PHB and urine concentrations of creatinine, at  
390 which the odds of having relapse was maximized. We also used the Youden index, aimed at maximizing  
391 the sensitivity and specificity simultaneously, to find an optimal cut-off point. The Youden index is the  
392 maximum of (sensitivity + specificity – 1) over all threshold values of PHB and normalized PHB and allows  
393 evaluation of a diagnostic test with respect to its true positive and true negative rates.<sup>57</sup>

394           Based on the results of these two criteria, two series of logistic regression models were used to  
395 evaluate whether PHB and normalized PHB (dichotomized by the optimal cut-off point) could predict  
396 Wilms tumor relapse. The first series was performed for the entire sample, considering either of the two  
397 PHB variables only. The second series were performed for patients with Wilms tumor. In addition to the  
398 PHB variables, three possible confounders were also included in the multivariate logistic regression  
399 models: Stage (I, II, or III), Histology (Blastema, Favorable Histology Wilms, Mixed Cell Wilms, or Epithelial),  
400 and Therapy (None vs. Any Chemotherapy). Backward selection was used to determine the most  
401 parsimonious model.

402           Fisher's Exact tests were also applied to assess if the PHB or normalized PHB values categorized  
403 by the optimal cut-off point differed significantly among the three groups and the different relapse sites.

404           All statistical analyses and figures were performed using SAS version 9.2 (Cary, NC, United  
405 States), Origin version 9.1 (Northampton, MA, United States), and Graph Pad version 7.01 (LaJolla, CA,  
406 United States).

#### 407 **Author Contributions**

408           MO contributed to the study design, data collection, experiments, and interpretation of results.  
409 AK, SA, MB, AH, IM, S. Gunasekera, LG, GB, and JR performed experiments. TH, YH, AN, YYC, PC, and S.  
410 Gadd assisted with data analysis. MLQ, TH, JD, EP, EM, HS contributed to the interpretation of results. EM,  
411 HS, and AK contributed to the study design, data analysis, and interpretation. AK and MO wrote the  
412 manuscript, with contributions from other authors.

#### 413 **Acknowledgements**

414           We thank the Children's Oncology Group Renal Tumor Committee for their support of this project.  
415 This study was supported by the Harvard Catalyst, Rally Foundation, Pablove Foundation, Hyundai Hope

416 on Wheels, the Pediatric Cancer Research Foundation, Family and Friends of Caroline Bhatt, the Kristen  
417 Ann Carr Fund, Met Life Foundation, and the NCI K12 CA184746, R01 CA214812, U10 CA180899, and P30  
418 CA008748. AK acknowledges the support of the St. Baldrick's Foundation, Damon Runyon–Richard  
419 Lumsden Foundation, Josie Robertson Investigator Program, Burroughs Wellcome Fund, Cycle for  
420 Survival, and the Rita Allen Foundation. We thank Lee Cohen-Gould and Juan Pablo Jimenez for technical  
421 assistance, and Joseph Olechnowicz for comments on the manuscript.

422

423 **References**

- 424 1. Dome JS, Graf N, Geller JI, et al. Advances in Wilms Tumor Treatment and Biology: Progress  
425 Through International Collaboration. *Journal of clinical oncology : official journal of the American*  
426 *Society of Clinical Oncology*. 2015;33(27):2999-3007.
- 427 2. Termuhlen AM, Tersak JM, Liu Q, et al. Twenty-five year follow-up of childhood Wilms tumor: a  
428 report from the Childhood Cancer Survivor Study. *Pediatric blood & cancer*. 2011;57(7):1210-  
429 1216.
- 430 3. Ooms AH, Gadd S, Gerhard DS, et al. Significance of TP53 Mutation in Wilms Tumors with  
431 Diffuse Anaplasia: A Report from the Children's Oncology Group. *Clinical cancer research : an*  
432 *official journal of the American Association for Cancer Research*. 2016;22(22):5582-5591.
- 433 4. Grundy PE, Breslow NE, Li S, et al. Loss of heterozygosity for chromosomes 1p and 16q is an  
434 adverse prognostic factor in favorable-histology Wilms tumor: a report from the National Wilms  
435 Tumor Study Group. *Journal of clinical oncology : official journal of the American Society of*  
436 *Clinical Oncology*. 2005;23(29):7312-7321.
- 437 5. Grundy PE, Telzerow PE, Breslow N, Moksness J, Huff V, Paterson MC. Loss of heterozygosity for  
438 chromosomes 16q and 1p in Wilms' tumors predicts an adverse outcome. *Cancer research*.  
439 1994;54(9):2331-2333.
- 440 6. Stern M, Longaker MT, Adzick NS, Harrison MR, Stern R. Hyaluronidase levels in urine from  
441 Wilms' tumor patients. *Journal of the National Cancer Institute*. 1991;83(21):1569-1574.
- 442 7. Lin RY, Argenta PA, Sullivan KM, Adzick NS. Diagnostic and prognostic role of basic fibroblast  
443 growth factor in Wilms' tumor patients. *Clinical cancer research : an official journal of the*  
444 *American Association for Cancer Research*. 1995;1(3):327-331.
- 445 8. Lin RY, Argenta PA, Sullivan KM, Stern R, Adzick NS. Urinary hyaluronic acid is a Wilms' tumor  
446 marker. *Journal of pediatric surgery*. 1995;30(2):304-308.

- 447 9. Coppes MJ. Serum biological markers and paraneoplastic syndromes in Wilms tumor. *Medical*  
448 *and pediatric oncology*. 1993;21(3):213-221.
- 449 10. Kentsis A, Lin YY, Kurek K, et al. Discovery and validation of urine markers of acute pediatric  
450 appendicitis using high-accuracy mass spectrometry. *Annals of emergency medicine*.  
451 2010;55(1):62-70.e64.
- 452 11. Kentsis A, Ahmed S, Kurek K, et al. Detection and diagnostic value of urine leucine-rich alpha-2-  
453 glycoprotein in children with suspected acute appendicitis. *Annals of emergency medicine*.  
454 2012;60(1):78-83.e71.
- 455 12. Kentsis A, Shulman A, Ahmed S, et al. Urine proteomics for discovery of improved diagnostic  
456 markers of Kawasaki disease. *EMBO molecular medicine*. 2013;5(2):210-220.
- 457 13. Kentsis A, Monigatti F, Dorff K, Campagne F, Bachur R, Steen H. Urine proteomics for profiling of  
458 human disease using high accuracy mass spectrometry. *Proteomics Clinical applications*.  
459 2009;3(9):1052-1061.
- 460 14. Henssen AG, Henaff E, Jiang E, et al. Genomic DNA transposition induced by human PGBD5.  
461 *eLife*. 2015;4.
- 462 15. Henssen AG, Kentsis A. Emerging functions of DNA transposases and oncogenic mutators in  
463 childhood cancer development. *JCI insight*. 2018;3(20).
- 464 16. Henssen AG, Koche R, Zhuang J, et al. PGBD5 promotes site-specific oncogenic mutations in  
465 human tumors. *Nature genetics*. 2017;49(7):1005-1014.
- 466 17. Henssen AG, Reed C, Jiang E, et al. Therapeutic targeting of PGBD5-induced DNA repair  
467 dependency in pediatric solid tumors. *Science translational medicine*. 2017;9(414).
- 468 18. Guo W, Xu H, Chen J, et al. Prohibitin suppresses renal interstitial fibroblasts proliferation and  
469 phenotypic change induced by transforming growth factor-beta1. *Molecular and cellular*  
470 *biochemistry*. 2007;295(1-2):167-177.



- 471 19. Gadd S, Huff V, Walz AL, et al. A Children's Oncology Group and TARGET initiative exploring the  
472 genetic landscape of Wilms tumor. *Nature genetics*. 2017;49(10):1487-1494.
- 473 20. Peng YT, Chen P, Ouyang RY, Song L. Multifaceted role of prohibitin in cell survival and  
474 apoptosis. *Apoptosis : an international journal on programmed cell death*. 2015;20(9):1135-  
475 1149.
- 476 21. Merkwirth C, Dargazanli S, Tatsuta T, et al. Prohibitins control cell proliferation and apoptosis by  
477 regulating OPA1-dependent cristae morphogenesis in mitochondria. *Genes & development*.  
478 2008;22(4):476-488.
- 479 22. Merkwirth C, Langer T. Prohibitin function within mitochondria: essential roles for cell  
480 proliferation and cristae morphogenesis. *Biochimica et biophysica acta*. 2009;1793(1):27-32.
- 481 23. Osman C, Merkwirth C, Langer T. Prohibitins and the functional compartmentalization of  
482 mitochondrial membranes. *Journal of cell science*. 2009;122(Pt 21):3823-3830.
- 483 24. Sato S, Murata A, Orihara T, et al. Marine natural product aurilide activates the OPA1-mediated  
484 apoptosis by binding to prohibitin. *Chemistry & biology*. 2011;18(1):131-139.
- 485 25. Semenzato M, Cogliati S, Scorrano L. Prohibitin(g) cancer: aurilide and killing by Opa1-  
486 dependent cristae remodeling. *Chemistry & biology*. 2011;18(1):8-9.
- 487 26. Thuaud F, Ribeiro N, Nebigil CG, Desaubry L. Prohibitin ligands in cell death and survival: mode  
488 of action and therapeutic potential. *Chemistry & biology*. 2013;20(3):316-331.
- 489 27. Scorrano L, Ashiya M, Buttle K, et al. A distinct pathway remodels mitochondrial cristae and  
490 mobilizes cytochrome c during apoptosis. *Developmental cell*. 2002;2(1):55-67.
- 491 28. Anand R, Wai T, Baker MJ, et al. The i-AAA protease YME1L and OMA1 cleave OPA1 to balance  
492 mitochondrial fusion and fission. *The Journal of cell biology*. 2014;204(6):919-929.
- 493 29. Frezza C, Cipolat S, Martins de Brito O, et al. OPA1 controls apoptotic cristae remodeling  
494 independently from mitochondrial fusion. *Cell*. 2006;126(1):177-189.

- 495 30. Mishra P, Carelli V, Manfredi G, Chan DC. Proteolytic cleavage of Opa1 stimulates mitochondrial  
496 inner membrane fusion and couples fusion to oxidative phosphorylation. *Cell metabolism*.  
497 2014;19(4):630-641.
- 498 31. Song Z, Chen H, Fiket M, Alexander C, Chan DC. OPA1 processing controls mitochondrial fusion  
499 and is regulated by mRNA splicing, membrane potential, and Yme1L. *The Journal of cell biology*.  
500 2007;178(5):749-755.
- 501 32. Ryan J, Montero J, Rocco J, Letai A. iBH3: simple, fixable BH3 profiling to determine apoptotic  
502 priming in primary tissue by flow cytometry. *Biological chemistry*. 2016;397(7):671-678.
- 503 33. Balsaver AM, Gibley CW, Jr., Tessmer CF. Ultrastructural studies in Wilms's tumor. *Cancer*.  
504 1968;22(2):417-427.
- 505 34. Pereira B, Chin SF, Rueda OM, et al. The somatic mutation profiles of 2,433 breast cancers  
506 refines their genomic and transcriptomic landscapes. 2016;7:11479.
- 507 35. Curtis C, Shah SP, Chin SF, et al. The genomic and transcriptomic architecture of 2,000 breast  
508 tumours reveals novel subgroups. *Nature*. 2012;486(7403):346-352.
- 509 36. Webster LR, Provan PJ, Graham DJ, et al. Prohibitin expression is associated with high grade  
510 breast cancer but is not a driver of amplification at 17q21.33. *Pathology*. 2013;45(7):629-636.
- 511 37. Liu T, Tang H, Lang Y, Liu M, Li X. MicroRNA-27a functions as an oncogene in gastric  
512 adenocarcinoma by targeting prohibitin. *Cancer letters*. 2009;273(2):233-242.
- 513 38. Kang T, Lu W, Xu W, et al. MicroRNA-27 (miR-27) targets prohibitin and impairs adipocyte  
514 differentiation and mitochondrial function in human adipose-derived stem cells. *The Journal of*  
515 *biological chemistry*. 2013;288(48):34394-34402.
- 516 39. Savulescu D, Feng J, Ping YS, et al. Gonadotropin-releasing hormone-regulated prohibitin  
517 mediates apoptosis of the gonadotrope cells. *Molecular endocrinology (Baltimore, Md)*.  
518 2013;27(11):1856-1870.

- 519 40. Fletcher CE, Dart DA, Sita-Lumsden A, Cheng H, Rennie PS, Bevan CL. Androgen-regulated  
520 processing of the oncomir miR-27a, which targets Prohibitin in prostate cancer. *Human*  
521 *molecular genetics*. 2012;21(14):3112-3127.
- 522 41. Watson JA, Bryan K, Williams R, et al. miRNA profiles as a predictor of chemoresponsiveness in  
523 Wilms' tumor blastema. *PLoS one*. 2013;8(1):e53417.
- 524 42. Ho MY, Liang CM, Liang SM. MIG-7 and phosphorylated prohibitin coordinately regulate lung  
525 cancer invasion/metastasis. *Oncotarget*. 2015;6(1):381-393.
- 526 43. Ma LL, Shen L, Tong GH, et al. Prohibitin, relocated to the front ends, can control the migration  
527 directionality of colorectal cancer cells. *Oncotarget*. 2017;8(44):76340-76356.
- 528 44. Cao Y, Liang H, Zhang F, et al. Prohibitin overexpression predicts poor prognosis and promotes  
529 cell proliferation and invasion through ERK pathway activation in gallbladder cancer. *Journal of*  
530 *experimental & clinical cancer research : CR*. 2016;35:68.
- 531 45. McBride H, Soubannier V. Mitochondrial function: OMA1 and OPA1, the grandmasters of  
532 mitochondrial health. *Current biology : CB*. 2010;20(6):R274-276.
- 533 46. Senft D, Ronai ZA. Regulators of mitochondrial dynamics in cancer. *Current opinion in cell*  
534 *biology*. 2016;39:43-52.
- 535 47. Chowdhury I, Thompson WE, Welch C, Thomas K, Matthews R. Prohibitin (PHB) inhibits  
536 apoptosis in rat granulosa cells (GCs) through the extracellular signal-regulated kinase 1/2  
537 (ERK1/2) and the Bcl family of proteins. *Apoptosis : an international journal on programmed cell*  
538 *death*. 2013;18(12):1513-1525.
- 539 48. Luna-Vargas MP, Chipuk JE. The deadly landscape of pro-apoptotic BCL-2 proteins in the outer  
540 mitochondrial membrane. *The FEBS journal*. 2016;283(14):2676-2689.
- 541 49. Renault TT, Floros KV, Elkholi R, et al. Mitochondrial shape governs BAX-induced membrane  
542 permeabilization and apoptosis. *Molecular cell*. 2015;57(1):69-82.

- 543 50. Faccenda D, Nakamura J, Gorini G, et al. Control of Mitochondrial Remodeling by the ATPase  
544 Inhibitory Factor 1&#xa0;Unveils a Pro-survival Relay via OPA1. *Cell Reports*.18(8):1869-1883.
- 545 51. Iwasaki S, Floor SN, Ingolia NT. Rocaglates convert DEAD-box protein eIF4A into a sequence-  
546 selective translational repressor. *Nature*. 2016;534(7608):558-561.
- 547 52. Basmadjian C, Thuaud F, Ribeiro N, Desaubry L. Flavaglines: potent anticancer drugs that target  
548 prohibitins and the helicase eIF4A. *Future medicinal chemistry*. 2013;5(18):2185-2197.
- 549 53. Polier G, Neumann J, Thuaud F, et al. The natural anticancer compounds rocaglamides inhibit  
550 the Raf-MEK-ERK pathway by targeting prohibitin 1 and 2. *Chemistry & biology*.  
551 2012;19(9):1093-1104.
- 552 54. Pan L, Woodard JL, Lucas DM, Fuchs JR, Kinghorn AD. Rocaglamide, silvestrol and structurally  
553 related bioactive compounds from *Aglaia* species. *Natural product reports*. 2014;31(7):924-939.
- 554 55. Kentsis A, Reed C, Rice KL, et al. Autocrine activation of the MET receptor tyrosine kinase in  
555 acute myeloid leukemia. *Nature medicine*. 2012;18(7):1118-1122.
- 556 56. Cohen-Gould L. Handling Cell Culture Monolayers for Transmission Electron Microscopy.  
557 *Microscopy Today*. 2013;21:36-39.
- 558 57. Youden WJ. Index for rating diagnostic tests. *Cancer*. 1950;3(1):32-35.

559

560

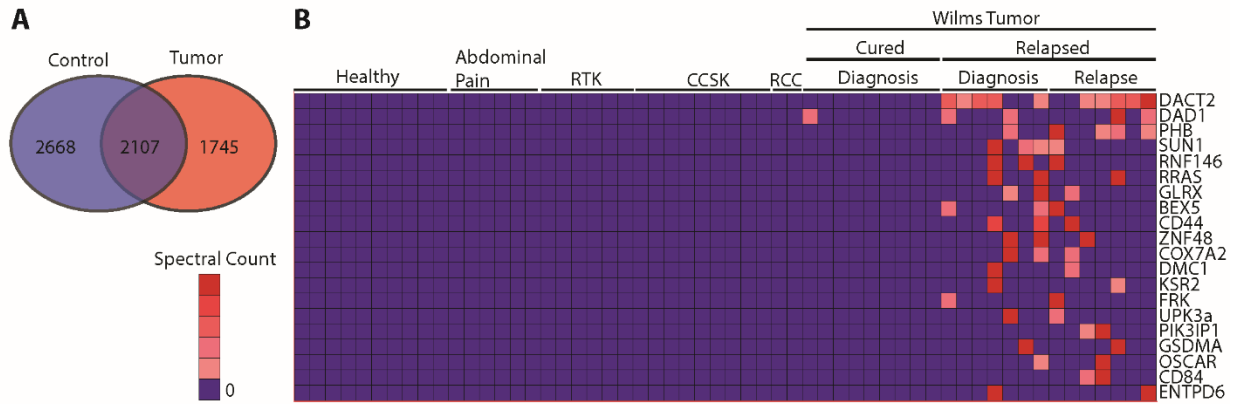

561

562 **Figure 1. Using high accuracy mass spectrometry to profile the urine proteomes of childhood**  
563 **kidney tumors reveals markers of relapse and chemoresistance.**

564 **(A)** This venn diagram demonstrates the distribution of unique proteins identified in the children  
565 without renal tumors (Blue) compared to those with tumors (Red) (n = 6520 proteins).

566 **(B)** The 20 proteins which were most highly enriched in Wilms tumors that relapsed are shown  
567 in this heat map (n=56 samples); RTK = Rhabdoid tumor of the kidney, CCSK = Clear cell sarcoma  
568 of the kidney, RCC = Renal cell carcinoma.

569

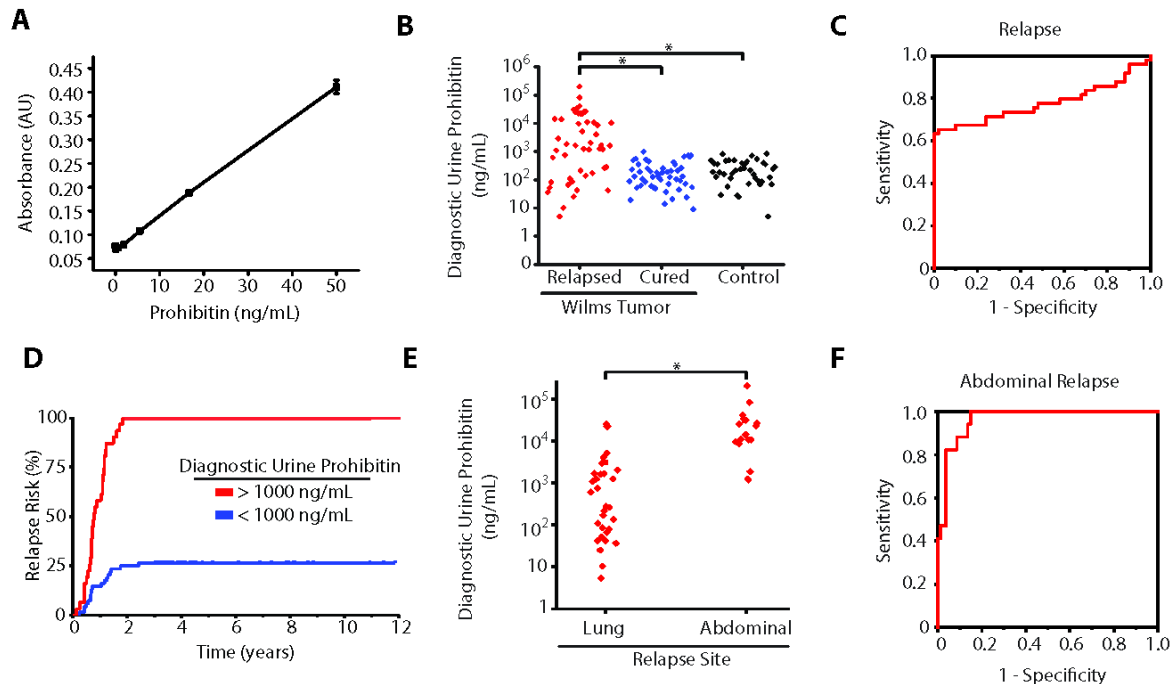

570

571 **Figure 2. Elevated urine prohibitin at diagnosis is a specific biomarker of relapse in favorable**  
572 **histology Wilms tumors.**

573 (A) Enzyme linked immunosorbance assay (ELISA) comparing known prohibitin levels (ng/mL)  
574 with measured absorbance via ELISA.

575 (B) Diagnostic urine prohibitin levels (ng/mL) in favorable histology Wilms tumor patients who  
576 relapsed (Red, n = 49) are compared with those who were cured (Blue, n = 50) and normal  
577 controls (Black, n = 40). Odds ratio of relapse for patients with diagnostic urine prohibitin > 1000  
578 ng/mL = 153 (95% CI = 19.6 - 1000).

579 (C) A receiver operating characteristic curve demonstrates the prognostic power of diagnostic  
580 urine prohibitin to predict relapse in favorable histology Wilms tumors at different sensitivity and  
581 specificity with an area under the curve of 0.77 (95% confidence interval 0.64-0.99).

582 (D) Risk of relapse in patients with favorable histology Wilms tumors are stratified by those with  
583 a diagnostic urine prohibitin > 1000 ng/mL (Red, n = 31) compared with those with a diagnostic  
584 urine prohibitin < 1000 ng/mL (Blue, n = 68).

585 (E) Diagnostic urine prohibitin levels in relapsed favorable histology Wilms tumor patients are  
586 stratified by site of relapse.

587 (F) A receiver operating characteristic curve demonstrates the prognostic power of diagnostic  
588 urine prohibitin to predict abdominal relapse in favorable histology Wilms tumors at different  
589 sensitivity and specificity with an area under the curve of 0.99 (95% confidence interval 0.99-1.0).

590

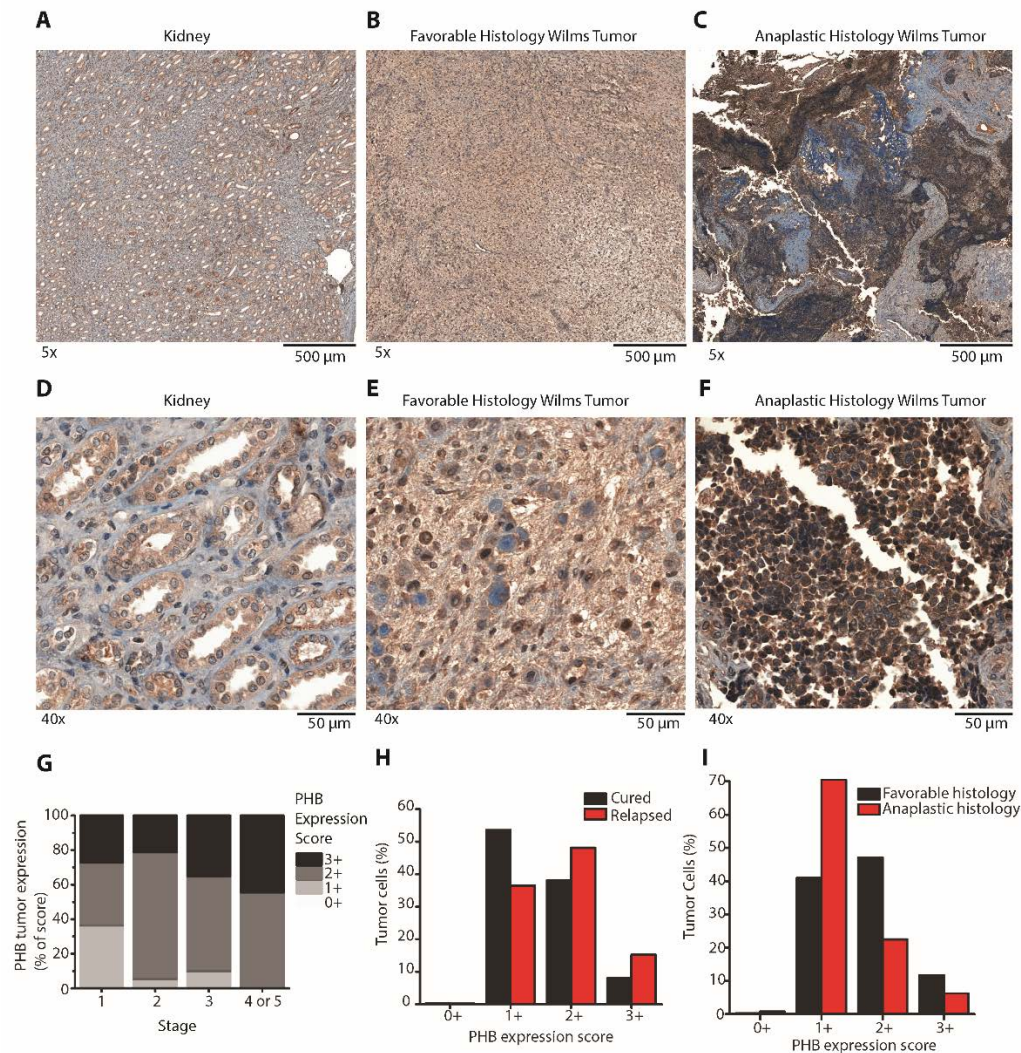

591

592 **Figure 3. Prohibitin is highly expressed in primary Wilms tumor samples.**

593 (A-F). PHB immunohistochemical (IHC) staining was performed on formalin fixed paraffin  
 594 embedded primary Wilms tumor samples and compared with adjacent normal kidneys. A-C are  
 595 5x magnified and E-F are 40x magnified. A and D include normal kidney. B and E include favorable  
 596 histology Wilms tumors. C and F include anaplastic histology Wilms tumors.

597 (G). IHC was performed on a tissue microarray containing 59 primary WT samples and graded  
 598 from 0+ to 3+ in a blinded manner. Quantification of IHC from the tissue microarray is shown  
 599 and stratified by initial tumor stage.

600 (H-I). A second cohort of 38 primary WT patients was assessed (15 cured, 16 relapsed, 7 no information;  
 601 24 favorable, 14 anaplastic WT). The expression of PHB was evaluated on a cell-by-cell basis using Halo  
 602 imaging analysis software. 24,862,509 cells in total were counted and scored from 0+ to 3+ based on PHB  
 603 expression. In panel H, PHB expression in the cells of Wilms tumors that ultimately relapsed are compared  
 604 with those that were cured. Whereas in panel I, PHB expression in the cells of Wilms tumors that had  
 605 favorable histology are compared with those with anaplastic histology.

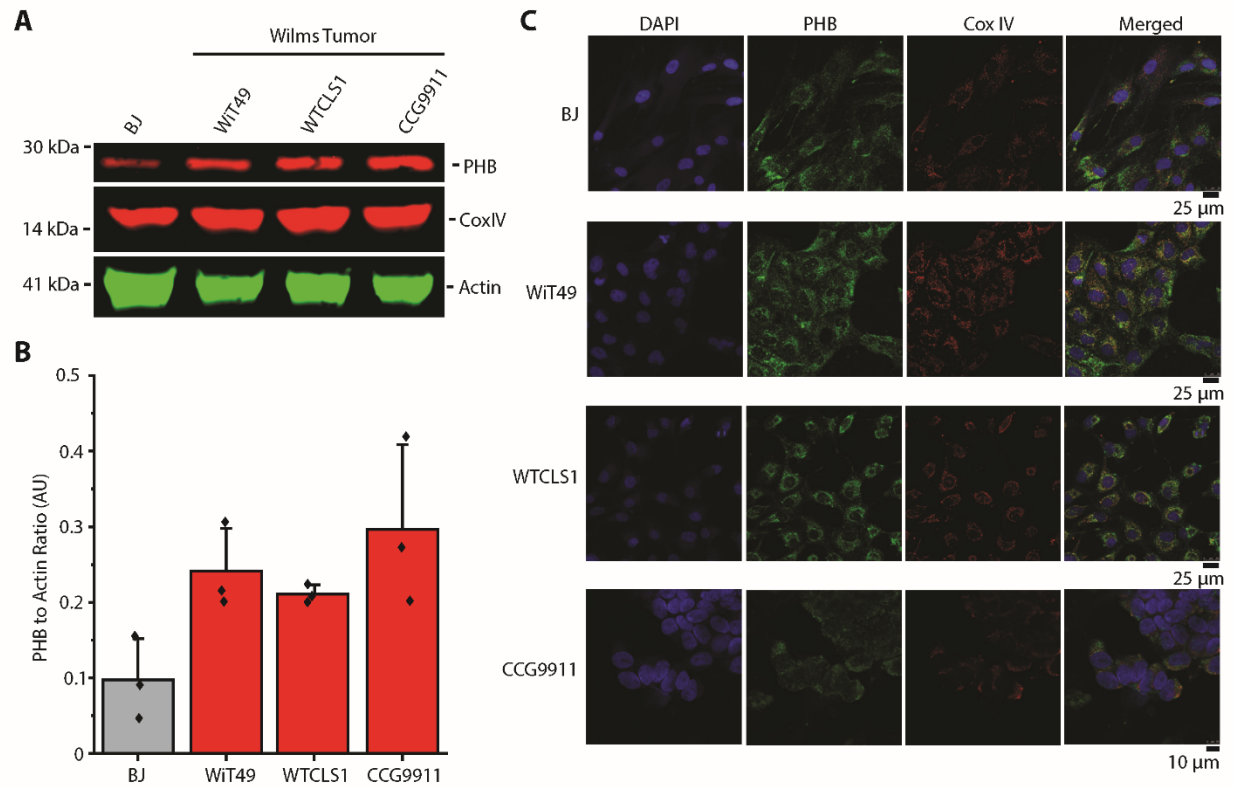

606

607 **Figure 4. Prohibitin is an abundant mitochondrial protein in Wilms tumor cell lines.**

608 (A). Our *in vitro* studies of PHB included a control fibroblast cell line (BJ) as well as three Wilms  
609 tumor cell lines (WiT49, WTCLS1, and CCG9911). Endogenous PHB expression in the Wilms tumor  
610 cell line is shown with Actin as a loading control and CoxIV as a mitochondrial loading control.

611 (B). PHB expression is compared in the different cell lines normalized to Actin in western blot  
612 triplicates.

613 (C). Confocal imaging demonstrates colocalization of PHB (Green) with the inner mitochondrial  
614 membrane marker CoxIV (Red) but not the nuclear marker Dapi (Blue) in paraformaldehyde fixed  
615 cells.

616



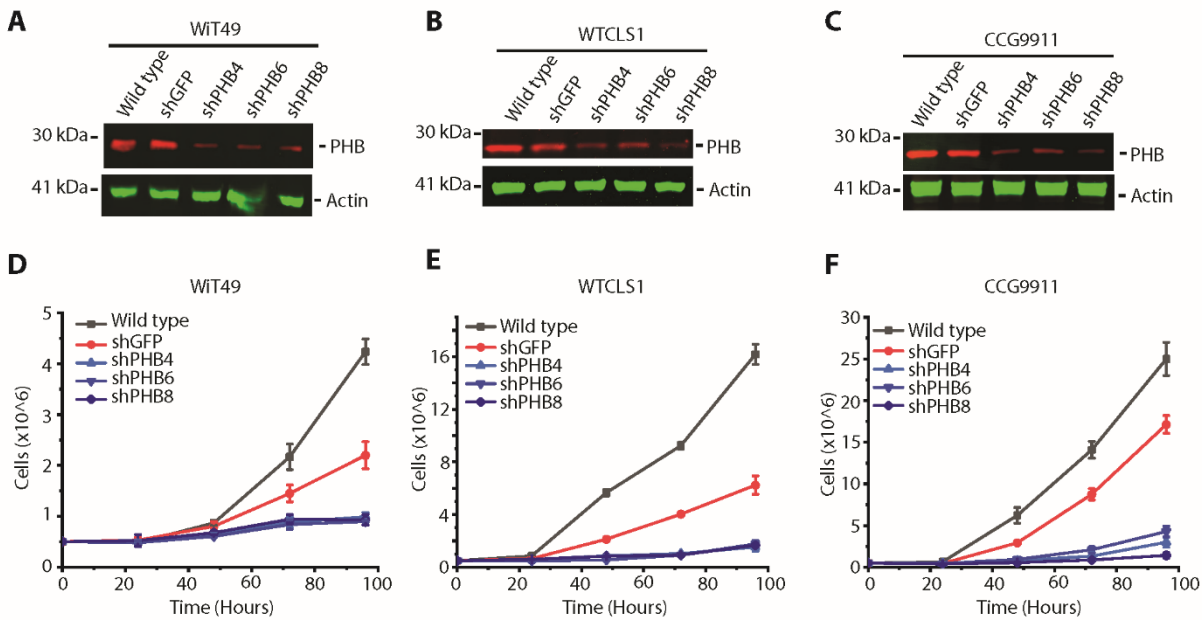

617

618 **Figure 5. Prohibitin is required for Wilms tumor growth and survival.**

619 (A-C). Western blots of wild type Wilms tumor cells (A, WIT49; B, WTCLS1; C, CCG9911) as well  
620 as a nontargeting shGFP and three different shRNA hairpins targeting the PHB 3'UTR (shPHB4)  
621 and CDS (shPHB6 and shPHB8). Cox IV is used for mitochondrial loading control and Actin is used  
622 for whole cell loading control.

623 (D-F). Cell growth over time in Wilms tumor cells (D, WIT49; E, WTCLS1; F, CCG9911) which are  
624 wild type (Black), compared with those transduced with non-targeting shGFP (Red), and the three  
625 PHB targeting shRNA (Blue).

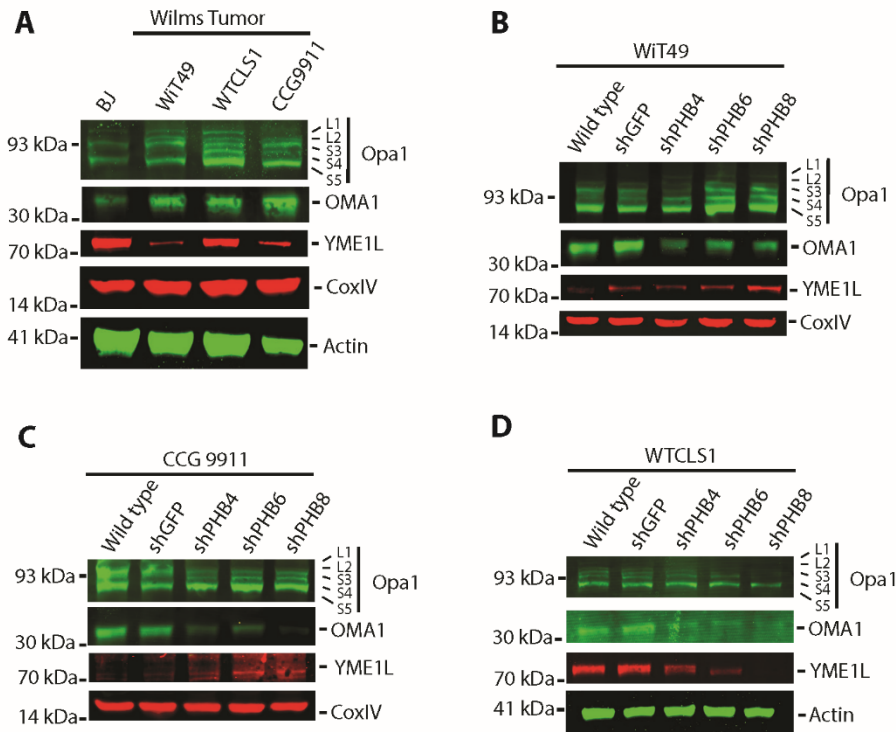

626  
627  
628  
629  
630  
631  
632  
633  
634  
635

**Figure 6. Depletion of prohibitin results in alterations in mitochondrial intermembrane proteases and structural proteins involved in apoptosis and mitochondrial morphogenesis.**

(A). Western blot of endogenous expression of Opa1, OMA1, and YME1L with Cox IV and Actin as mitochondrial and whole cellular loading controls, respectively.

(B-D). Western blots of Opa1, OMA1, and YME1L in Wilms tumor cells (B, WIT49; C, WTCLS1; D, CCG9911) comparing wild type cells with nontargeting shGFP and three different shRNA hairpins targeting the PHB 3'UTR (shPHB4) and CDS (shPHB6 and shPHB8). Loading controls as shown.

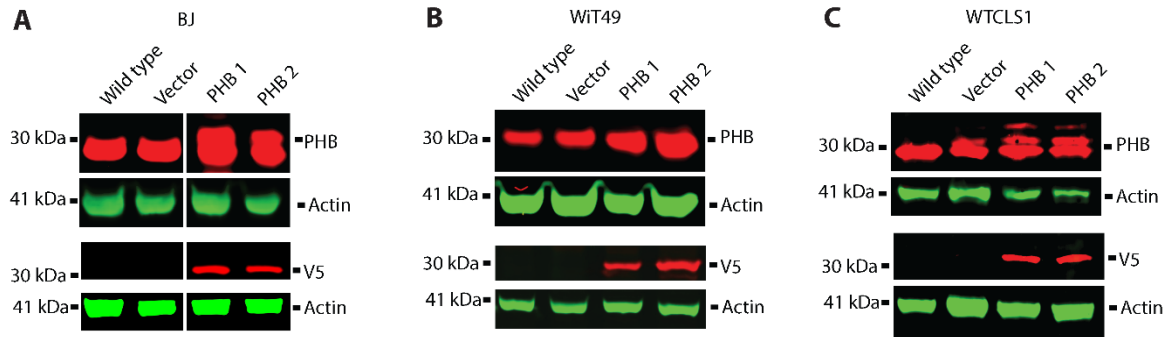

636

637 **Figure 7. Overexpression of prohibitin in Wilms tumor and control cell lines**

638 (A-C). Western blots of PHB and V5 in control (A, BJ) and Wilms tumor cells (B, WiT49; C, WTCLS1)

639 comparing wild type cells and those transduced with an empty vector with two different clones

640 transduced with a PHB expressing vector containing a V5 tag.

641

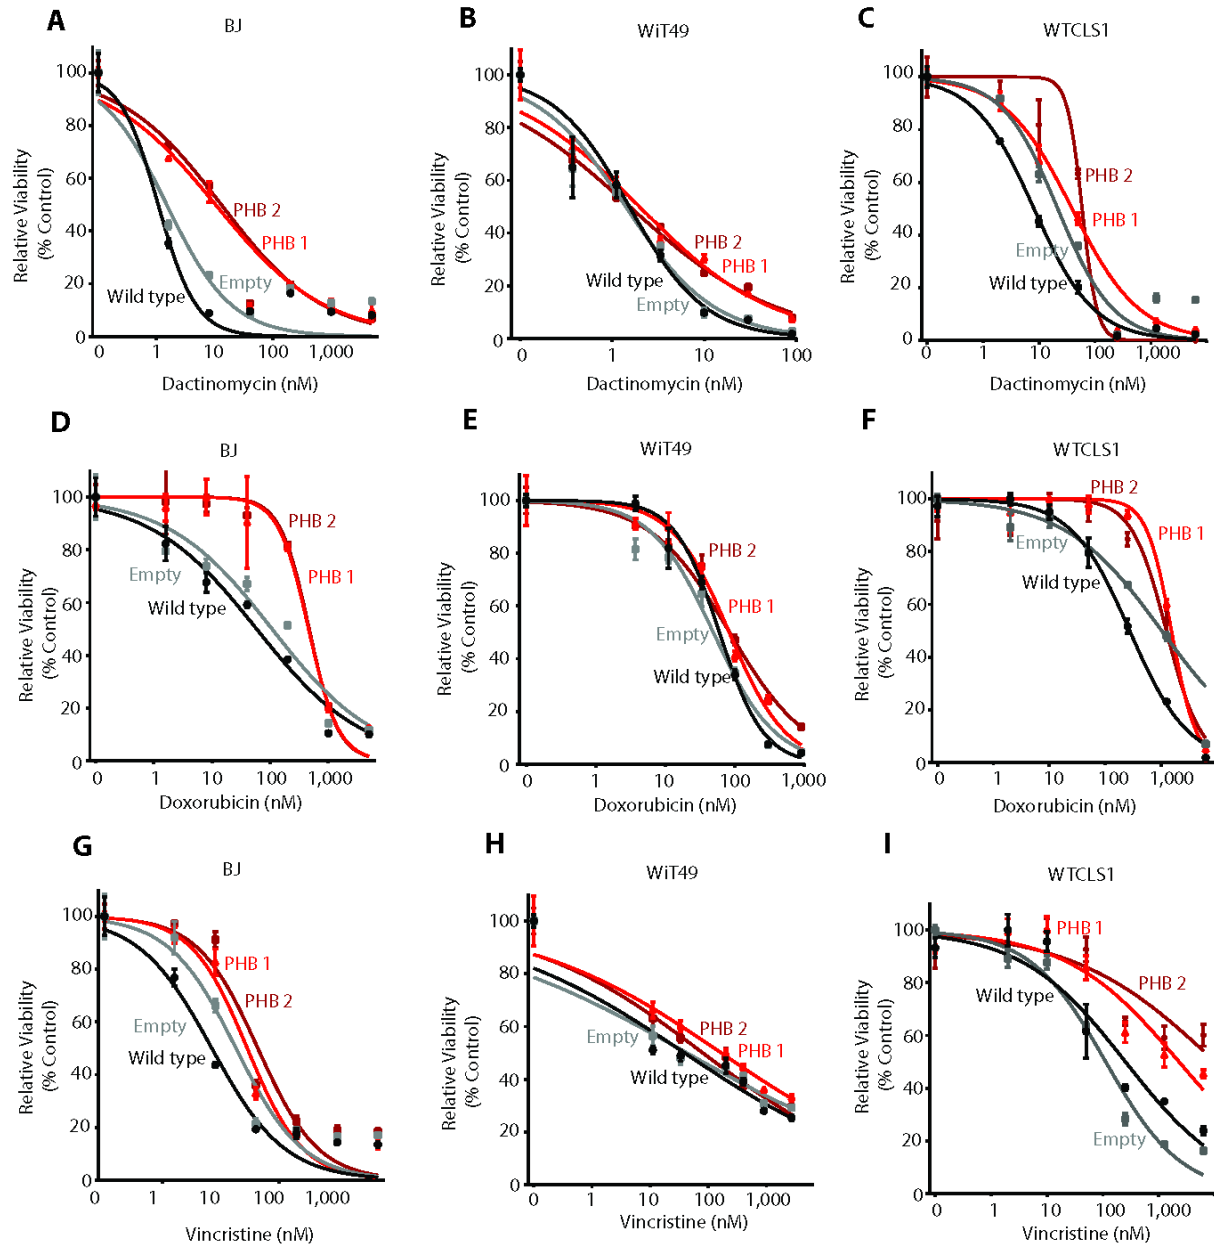

642

643 **Figure 8. Overexpression of prohibitin results in resistance to chemotherapy in both Wilms**  
644 **tumor and control cells.**

645 (A-I). Dose response curve of BJ (D, G, J), WiT49 (E, H, K), and WTCLS1 (F, I, L) cells treated with  
646 Dactinomycin (D-F), Doxorubicin (G-I), or Vincristine (J-L) for 72 hrs comparing wild type cells  
647 (Black), empty vector transduced cells (Gray), as well as PHB transduced cells (Red, Dark Red).

648

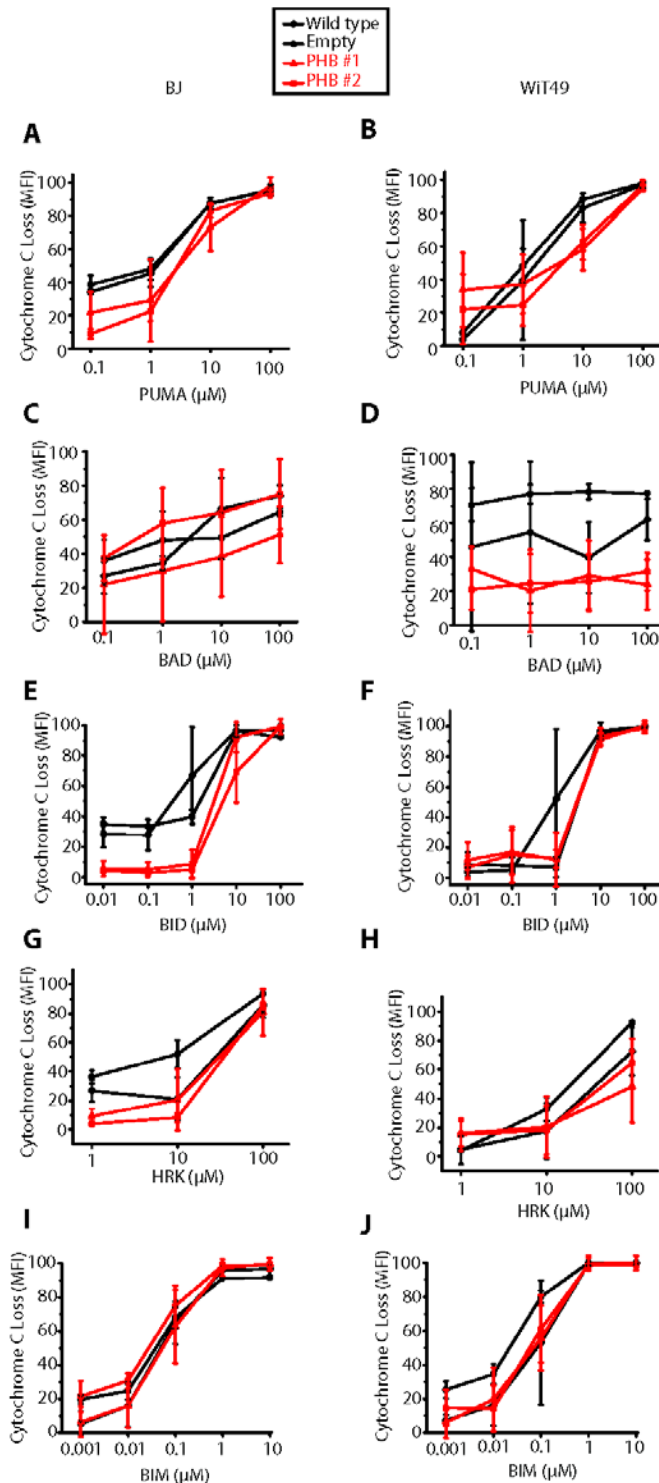

649

650 **Figure 9. BH3 profiling reveals globally decreased apoptotic priming in response to PHB**  
651 **overexpression.**

652 (A-J). Cytochrome c loss in response to treatment with different pro-apoptotic peptides  
653 comparing Wild type (Black Diamond), with Empty (Black Circles), and two PHB overexpressing  
654 cell lines (Red Triangle, Red Square) in both BJ control fibroblasts and WiT49 Wilms tumors.

655

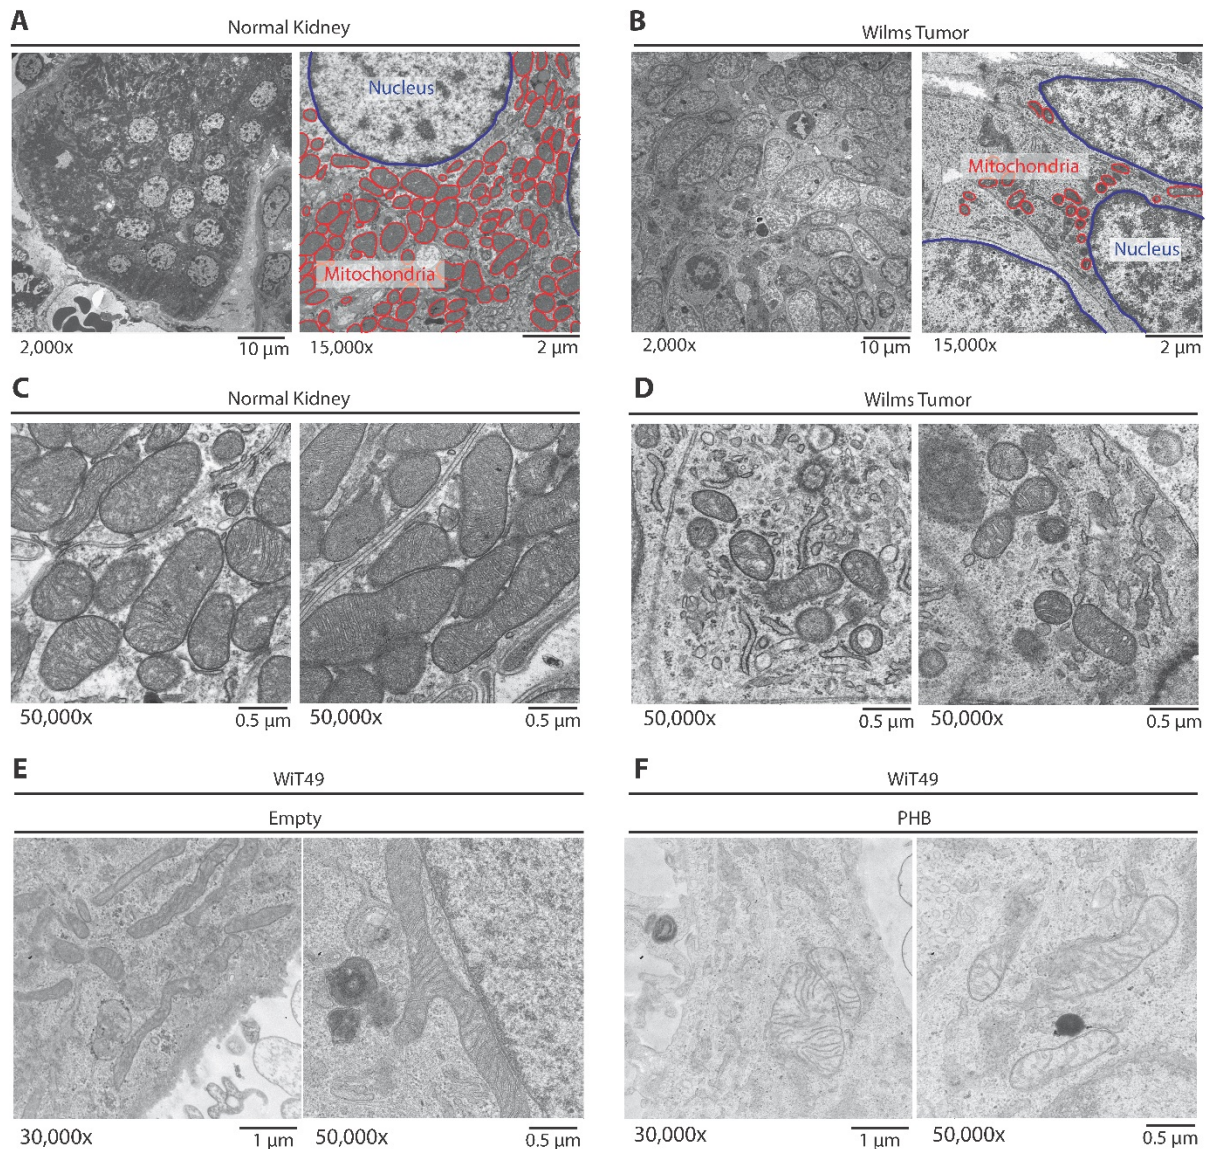

656

657 **Figure 10. Primary Wilms tumor samples exhibit fewer mitochondria and predominantly a**  
658 **fission phenotype, as compared with adjacent normal kidneys.**

659 **(A-D).** Untreated favorable histology Wilms tumor was immediately fixed following nephrectomy  
660 and imaged using a transmission electron microscope to evaluate mitochondrial morphology.  
661 The normal kidney (Panel A, 2,000x magnification; Panel C, 50,000x magnification) is compared  
662 with the Wilms tumor (Panel B, 2,000x magnification; Panel D, 50,000x magnification). Panels A  
663 and B also highlight at 15,000x the size and number of the mitochondria (red) as compared with  
664 the nucleus (blue).

665 **(E-F).** Characteristic mitochondria of a Wilms tumor cells (WiT49) treated with an empty vector  
666 (E) compared with a PHB overexpressing vector (F).

667

668

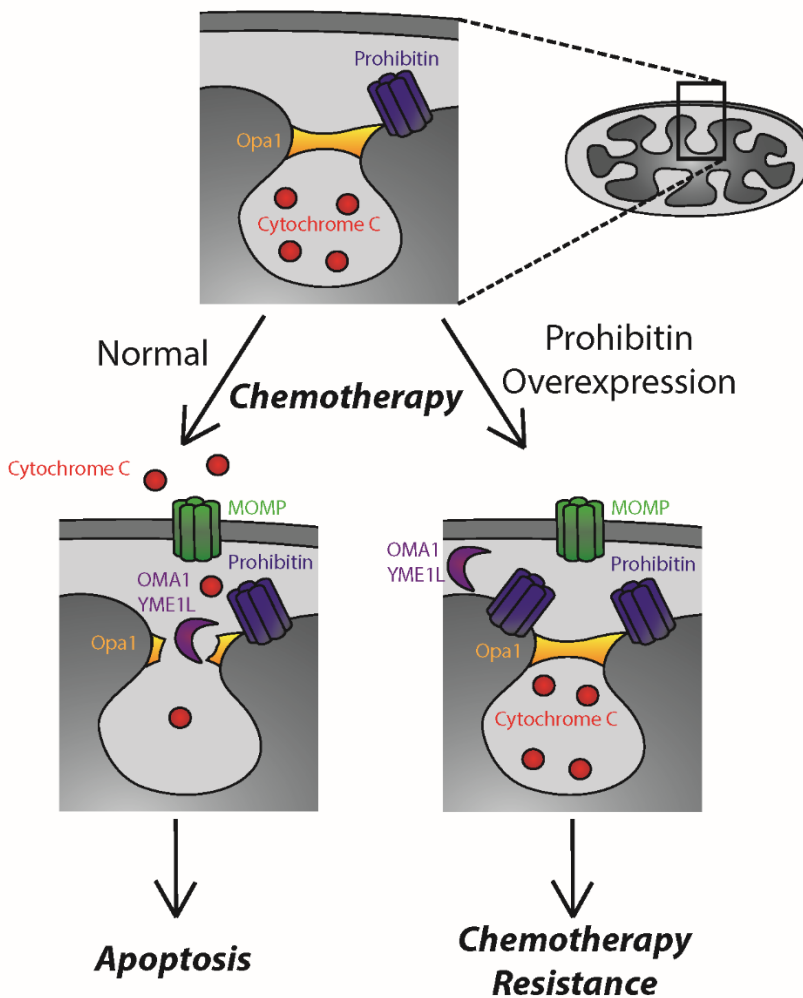

669

670 **Figure 11. PHB overexpression leads to failure to release cytochrome c from cristae junctions**  
671 **despite the presence of a MOMP complex**

672 Prohibitin (Blue) forms a complex along the mitochondrial inner membrane that interacts with  
673 several key regulators of apoptosis, including the Opa1 complex (Orange) located at cristae  
674 junctional openings. The majority of cytochrome c (Red) is sequestered within these cristae and  
675 in response to an apoptotic stimuli such as chemotherapy, the mitochondrial outer membrane  
676 pore (MOMP) complex consisting of BAX and BAK is inserted into the mitochondrial outer  
677 membrane. Upon proteolysis of the Opa1 complex, generally via OMA1 or other intermembrane  
678 proteases (Purple), Cytochrome c is released into the cytosol where it results in the apoptotic  
679 cascade. Our model proposes that due to the overexpression of PHB, in response to apoptotic  
680 stimuli, intermembrane proteases are no longer able to access the Opa1 complex thereby  
681 resulting in resistance to chemotherapy despite the presence of a MOMP pore in the outer  
682 mitochondrial membrane, ultimately resulting in failure to undergo apoptosis and chemotherapy  
683 resistance.
